# Supplementary material
Source: PubMed Central journal article supplement (PMC4058365)

### Supplementary Figures

**Fig. S1 Precursor of miR-542-3p induces p53 expression.** U2OS cells were transfected with either empty vector or genomic sequence that expresses precursor of miR-542-3p (pre-miR-542). After two days, cells were harvested for RNA and protein extraction. (A) The expression of miR-542-3p was determined by quantitative real-time RT-PCR. (B) The expression of p53 was assayed by western blotting.

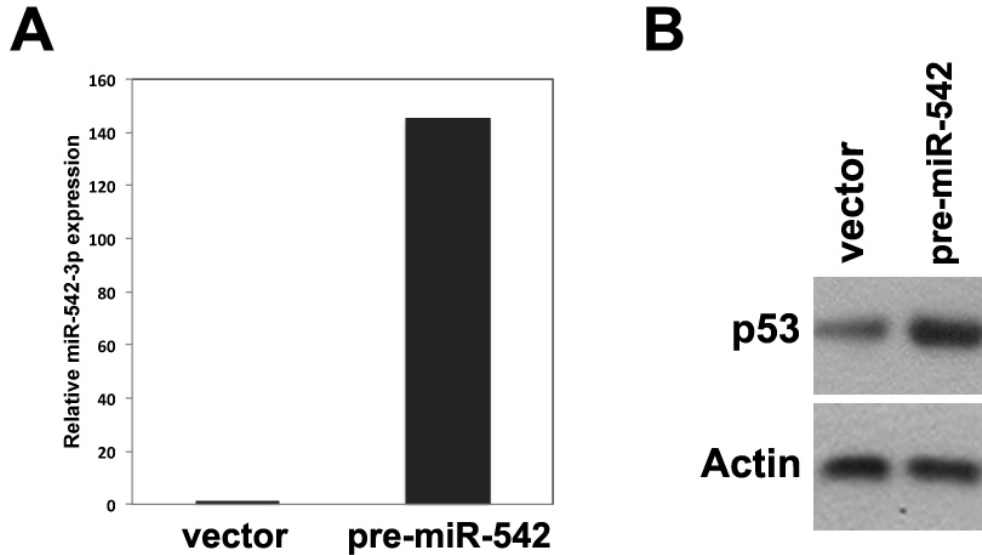

**Fig. S2 MiR-542-3p has no effect on p53 mRNA level.** U2OS cells were transfected with negative or miR-542-3p mimics for 48 hr. Cells were then harvested for RNA extraction and p53 mRNA level quantitation by real-time RT-PCR.

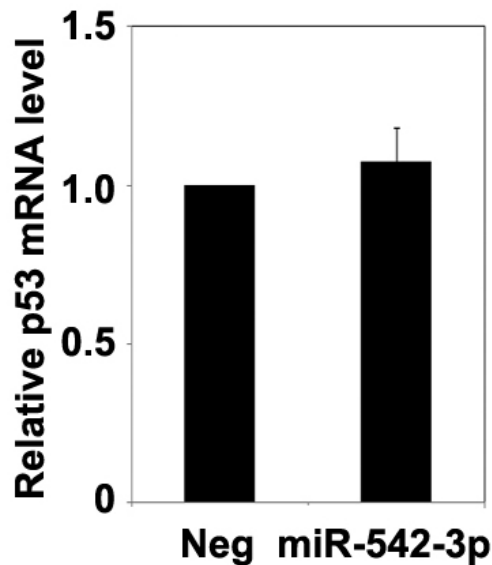

**Fig. S3 Effects of miR-542-3p on p53 expression in multiple cell lines.** Several cell lines, including normal human foreskin fibroblasts (HF) and tumor cell lines HCT116, T98G, U118 and MDA-MB-231, were transfected with negative or miR-542-3p mimics. Two days later, cells were harvested for western blot analysis of p53 expression.

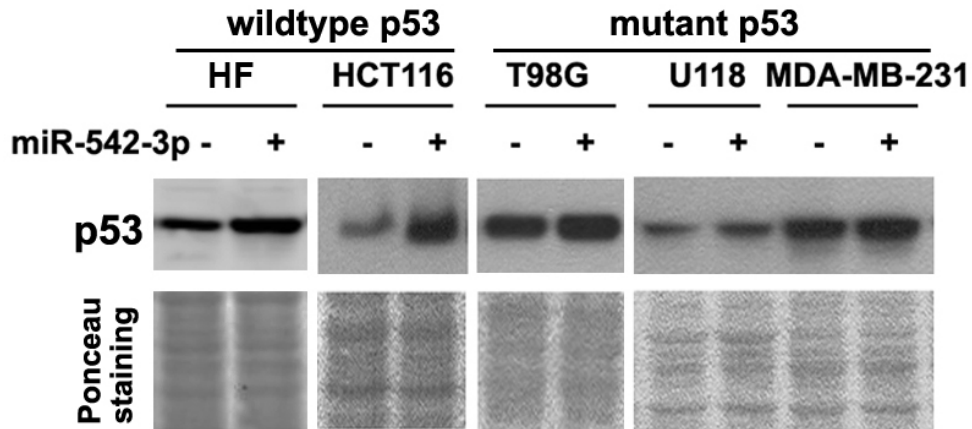

**Fig. S4 MiR-542-3p has no effect on expression levels of various modulators of p53 degradation.** U2OS cells were transfected with negative or miR-542-3p mimics for 48 hr. Cells were pelleted for analysis of various p53 modulators by western blotting.

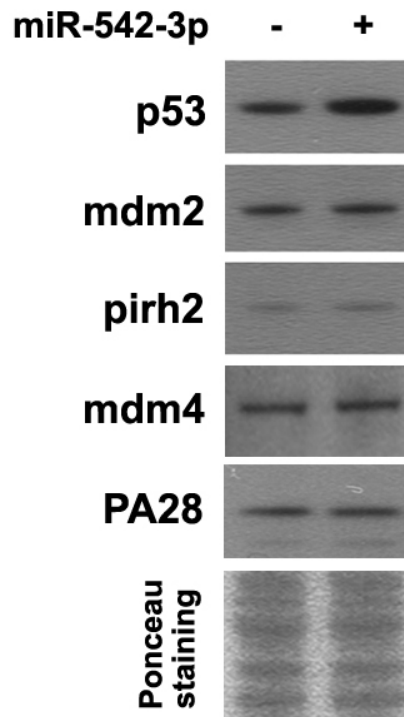

**Fig. S5 Actinomycin D induces p53 expression.** U2OS cells were treated with actinomycin D at 5 nM for 24 h. Cells were then harvested for western blot analysis of p53 and RPS23 expression.

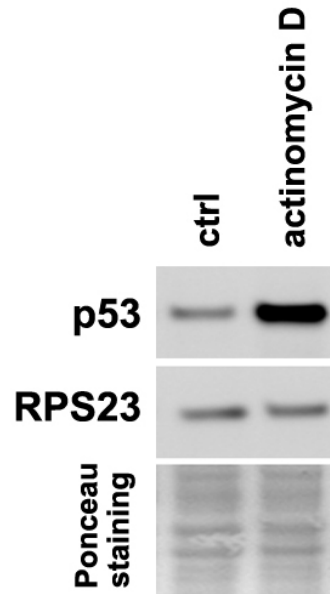

**Fig. S6 Amplification of RPS23 transcript.** (A) Scheme of RPS23 mRNA deposited in the NCBI database. (B) Total RNA extracted U2OS cells was reverse transcribed into cDNA using oligo-dT primers. Since RPS23 gene is organized into four exons ( ), RPS23 transcript fragments were then amplified with PCR using primers designed to target different exons to verify the presence of the full RPS23 transcript. (C) The region spanning miR-542-3p binding site in RPS23 3'UTR was validated using Sanger sequencing with the PCR product (84-3281) from (B).

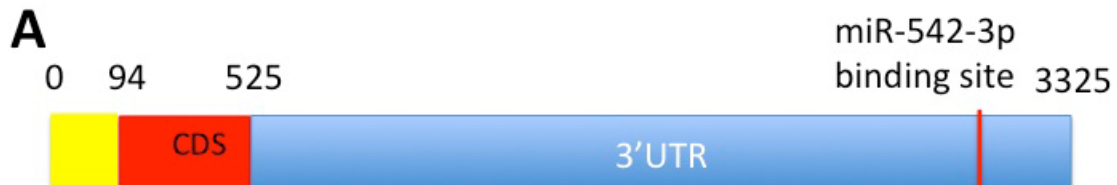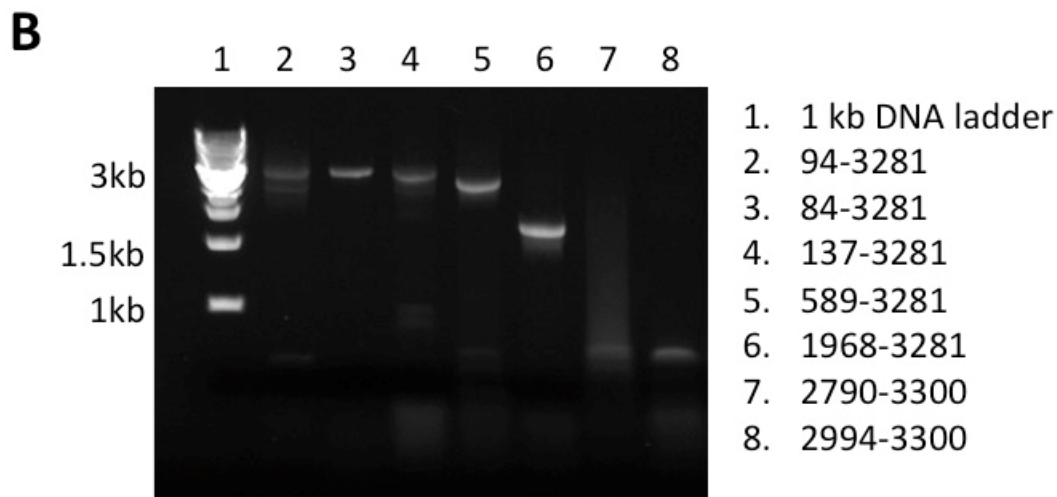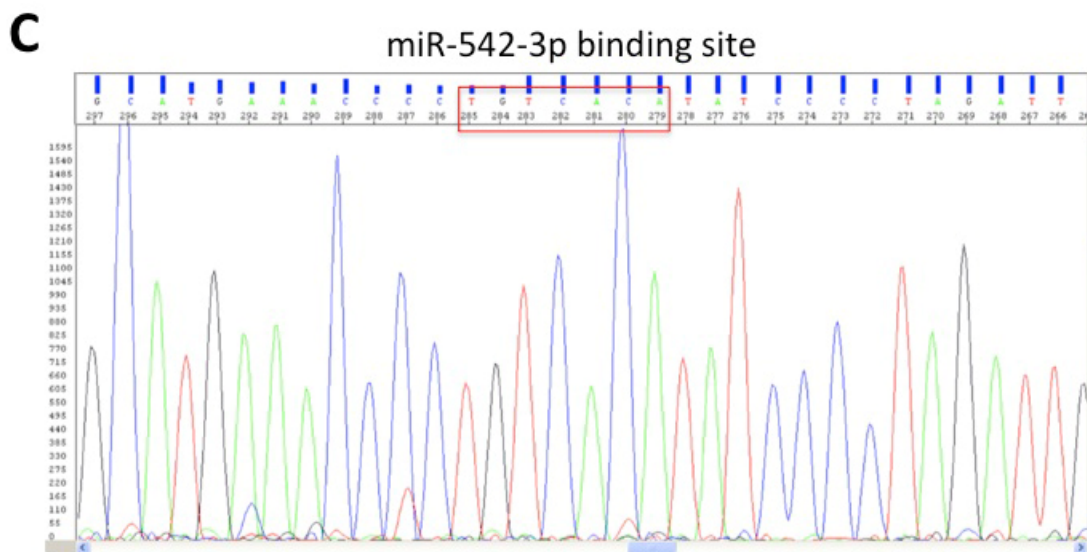

**Fig. S7 Effects of miR-542-3p and siRPS23 on cell growth.** U2OS cells were transfected with negative control, miR-542-3p mimics or siRPS23. Images (phase contrast) were taken 48 h following the transfection.

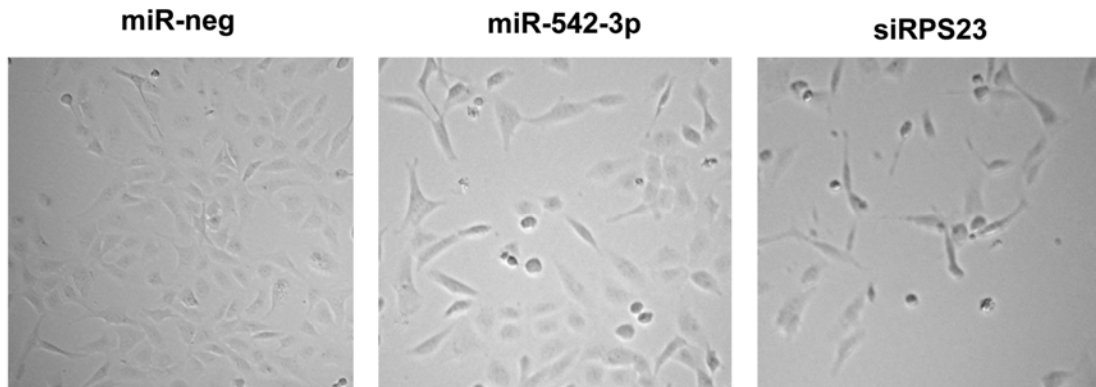

**Fig. S8 MiR-542-3p Inhibits cell growth independent of RPS23.** U2OS cells expressing empty vector or V5-tagged RPS23 were transfected with negative or miR-542-3p mimics for 2 days. Cells were then reseeded at  $1 \times 10^4$  cells/well in 12-well for 5-days before being fixed and stained. Relative cell growth was calculated after re-solubilizing the plates.

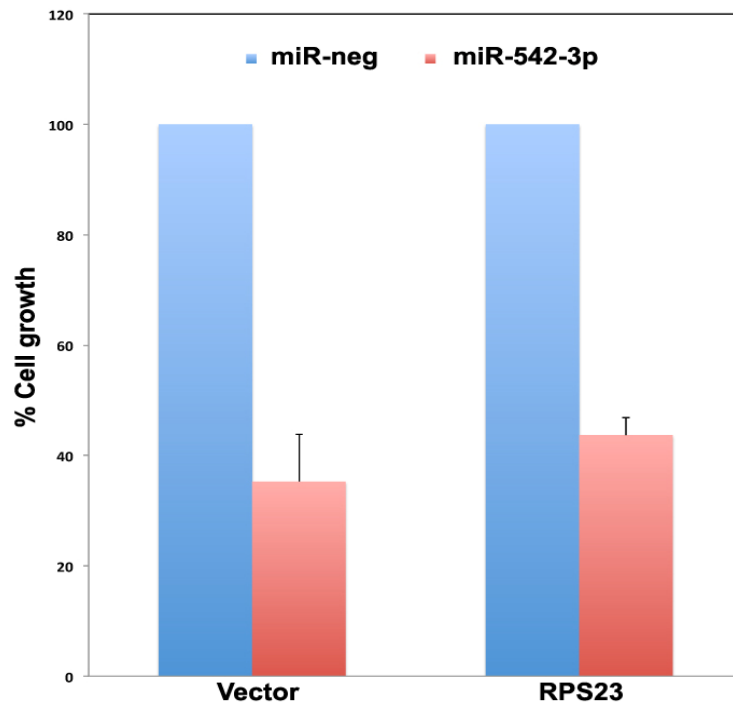

**Fig. S9 miR-542-3p inhibits cell growth independent of p53.** U2OS cells (A) stably expressing scramble shRNA or p53 shRNA and HCT116 cells (B) with wildtype (WT) p53 or without p53 (p53<sup>-/-</sup>) were transfected as indicated for two days. Cells were then reseeded at 1x10<sup>4</sup> cells/well in 12-well for 5-days before being fixed and stained. Relative cell growth was calculated after re-solubilizing the plates.

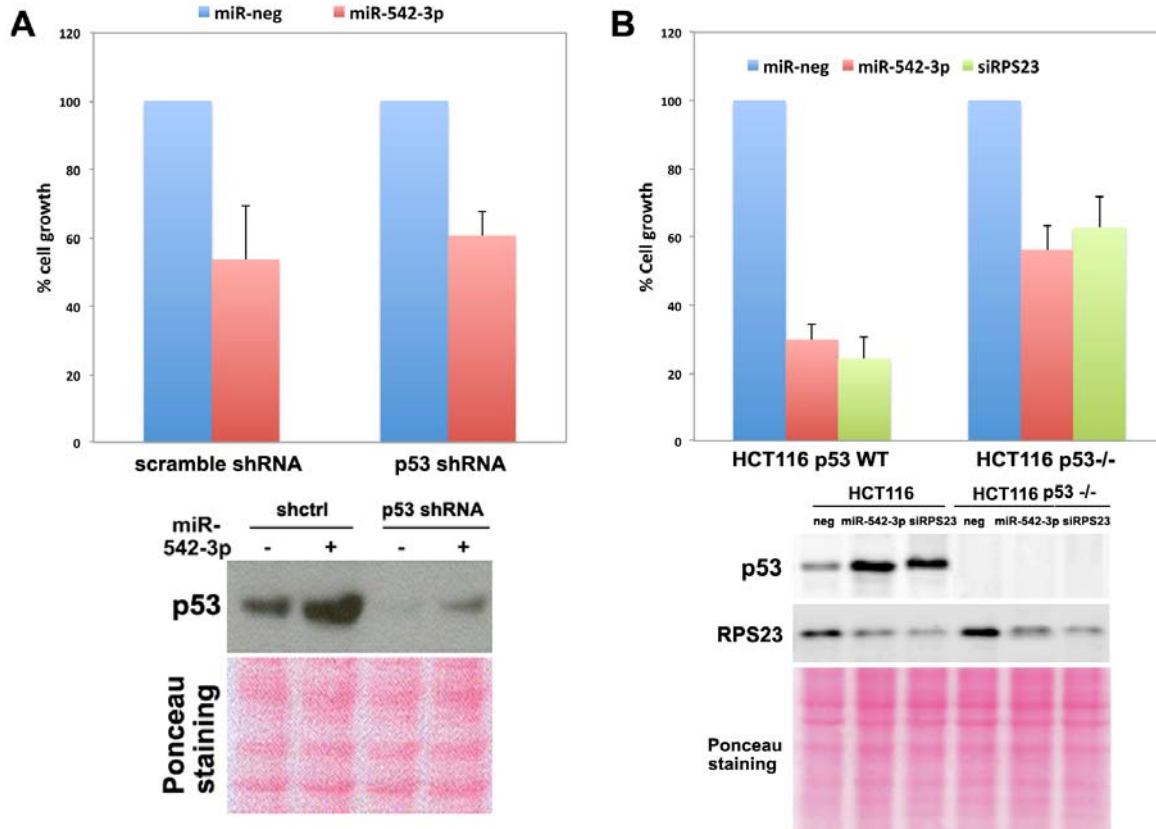

Supplement: NIHMS589585-supplement-2.pdf [file NIHMS589585-supplement-2.pdf]
